# Supplementary material for: Clinical Utility of LCT Genotyping in Children with Suspected Functional Gastrointestinal Disorder
Source: MDPI journal article supplement (doi:10.3390/nu12103017), 2020-10-01
Supplement: s1 [file s1]

**Table S1. Comparison of genotypes according to lactose absorption/malabsorption and lactose tolerance/intolerance.**

|                                 | p-value (adjusted Fisher) |                      |                      |                        |                      |                      |                        |                      |                      |
|---------------------------------|---------------------------|----------------------|----------------------|------------------------|----------------------|----------------------|------------------------|----------------------|----------------------|
| HBT                             | Sample A (n = 493)        |                      |                      | Sample B (n = 120)     |                      |                      |                        |                      |                      |
|                                 | C/T-13910 polymorphism    |                      |                      | C/T-13910 polymorphism |                      |                      | G/A-22018 polymorphism |                      |                      |
|                                 | CC: CT                    | CC: TT               | CT: TT               | CC: CT                 | CC: TT               | CT: TT               | GG: GA                 | GG: AA               | GA: AA               |
| <b>Absorption/malabsorption</b> | 2.75e <sup>-62</sup>      | 1.09e <sup>-34</sup> | 6.98e <sup>-01</sup> | 2.78e <sup>-13</sup>   | 9.23e <sup>-07</sup> | 2.84e <sup>-01</sup> | 1.08e <sup>-12</sup>   | 6.80e <sup>-07</sup> | 1.37e <sup>-01</sup> |
| <b>Tolerance/intolerance</b>    | 9.81e <sup>-10</sup>      | 3.04e <sup>-02</sup> | 3.35e <sup>-02</sup> | 0.009                  | 0.642                | 0.646                | 0.00348                | 0.63300              | 0.65000              |

*In the case of the C/T-13910 polymorphism, analyses were performed for both samples (A and B). For the G/A-22018 polymorphism, the analysis was performed only for sample B. Abbreviation: HBT, hydrogen breath-test.*
